# Supplementary material for: Predictability is attractive: Female preference for behaviourally consistent males but no preference for the level of male aggression in a bi-parental cichlid
Source: PLoS One. 2018 Apr 10;13(4):e0195766. doi: 10.1371/journal.pone.0195766 (PMC5892930; doi:10.1371/journal.pone.0195766)
Supplement: S4 File — (R) [file pone.0195766.s004.R]

#####################
# 1 Packages                             
#####################

library("lme4")  # For linear mixed-effect models
library("GenABEL")  # For z-transformation
library("r2glmm")   # For partial R^2


#####################
# 2 Data                                    
#####################

### Read in data file
### MC <-"S3_File.xlsx"


# Delete trials with damaged video files
MC <- MC[MC$comment !="damaged_video_file", ]


# Remove side-biases
MC_noSB <- MC[MC$side_bias > 0.20, ] 
MC_noSB <- MC_noSB[MC_noSB$side_bias < 0.80, ] 


# Data subset: consistent males only
MC_noSB_C <- MC_noSB[MC_noSB$male_consistency_type=="consistent", ]


# Data subset: high aggression males only
MC_noSB_HA <- MC_noSB[MC_noSB$male_type_level_of_aggression =="high aggression", ]


# Data subset: consistent high-aggression males only
MC_noSB_HAC <- MC_noSB[MC_noSB$male_type_combined =="high aggression-consistent", ]


# Data subset: consistent low-aggression males only
MC_noSB_LAC <- MC_noSB[MC_noSB$male_type_combined =="low aggression-consistent", ]


#####################
# 3 Preference analyses           
#####################

###
### 3.1 Does female preference for the level/consistency of aggression depend on within male dyad behavioural contrast?
###


### Effect of within male dyad behavioural contrast in the consistency of aggression on female preference

attach(MC_noSB_C)

m1 <- lmer(asin(sqrt(strength_of_preference)) ~ within_male_dyad_difference_consistency + (1| male_ID),REML = F)
m2 <- update(m1, ~.- within_male_dyad_difference_consistency)
anova(m1, m2)

detach(MC_noSB_C)


### Effect of within male dyad behavioural contrast in the level of aggression on female preference

# The analysis for the effect of within male dyad behavioural contrast in the level of aggression on female preference was performed identically to the above example; use data subset "MC_noSB_HA"


###
### 3.2 Do females show an above average preference (> 50%) for particular male behavioural types?
###


### Female preference for consistent males

attach(MC_noSB_C)

nullmodel <- lmer(asin(sqrt(strength_of_preference)) ~ 1 + (1| male_ID) ,REML = F)
summary(nullmodel)
confint(nullmodel)

# For backtransformations:
# (sin(value))^2

detach(MC_noSB_C)


### Female preference for other male behavioural types was performed identically to the above example.
# For female preference for high-aggression males (including consistent- and inconsistent-aggression males) use data subset "MC_noSB_HA"
# For female preference for consistent high-aggression males use data subset "MC_noSB_HAC"
# For female preference for consistent low-aggression males use data subset "MC_noSB_LAC"


###
### 3.3 Does female preference differ between male behavioural types?
###

### Difference between consistent high-aggression and consistent low-aggression males

attach(MC_noSB_C)

m1 <- lmer(asin(sqrt(strength_of_preference)) ~ male_type_combined + (1| male_ID),REML = F)
m2 <- update(m1, ~.-male_type_combined)
anova(m1,m2)   
summary(m1)

detach(MC_noSB_C)


### Difference between consistent high-aggression and consistent low-aggression males
# The difference in female preference between consistent high-aggression and inconsistent high-aggression males was performed identically to the above example; use data subset "MC_noSB_HA"


###
### 3.4 Does female preference depend on male-female behavioural similiarity?
###

attach(MC_noSB_HA)

# Standardisation of predictor variables
z_simR_L <- ztransform(relative_similarity_level,family=gaussian)
z_simR_C <- ztransform(relative_similarity_consistency,family=gaussian)

# Model
m1 = lmer(asin(sqrt(strength_of_preference)) ~  z_simR_L + z_simR_C +  (1| male_ID) , REML=FALSE)
m2a <-update(m1,~.-z_simR_L) 
m2b <-update(m1,~.-z_simR_C) 
anova(m1, m2a)
anova(m1, m2b)
summary(m1)
# Partial R^2
(r2nsj = r2beta(m1, method = "nsj", partial = TRUE))

m3 <-update(m2a,~.-z_simR_C) 
anova(m2a, m3)
summary(m2a)
# Partial R^2
(r2nsj = r2beta(m2a, method = "nsj", partial = TRUE))

detach(MC_noSB_HA)
